# Supplementary material
Source: PubMed Central journal article supplement (PMC3939903)
Supplement: 1324209111_pnas.201324209SI.pdf [file 1324209111_pnas.201324209SI.pdf]

# Supporting Information

Valastyan et al. 10.1073/pnas.1324209111

## SI Materials and Methods

**Materials.** Simvastatin was obtained from Sigma-Aldrich. Fluconazole was obtained from VWR.

**Yeast Strains and Growth Conditions.** All experiments were performed in the W303 background unless otherwise noted. Secretion assays used a *bar1* mutant strain, which was a gift from the Fink laboratory (Whitehead Institute, Cambridge, MA). The standard lithium acetate transformation protocol was used for all transformations (1). To select for single integrants, ~50 ng of cut plasmid DNA was used in the transformation, resulting in a mix of single and tandem integrants. To select for tandem integrants, ~500 ng of cut plasmid DNA was used in the transformation. Although all data used fusions with fluorescent proteins, untagged  $\alpha$ -synuclein ( $\alpha$ -syn) splice isoforms were retested in multiple experiments and behaved similarly.

Standard conditions were used for all yeast growth. For galactose induction, unless otherwise noted, cells were grown to log phase for 6–8 h in synthetic medium containing glucose before being diluted into synthetic medium containing raffinose for overnight growth. Log-phase cells then were diluted into synthetic medium containing galactose for induction. Unless otherwise specified, cells were induced for 6 h.

For screening suppressors and enhancers, a standard lithium acetate transformation protocol was adapted for use with 96-well plates (1, 2). After 2 d of growth, galactose plates were scanned, and the density of the spot was analyzed using ImageQuant TL. This process was repeated at least three times for each strain.

Synthetic medium included 0.67% yeast nitrogen base without amino acids (Fischer Scientific) supplemented with amino acids as needed (MP Biomedicals) and 2% (wt/vol) sugar. Yeast extract/peptone medium included 1% yeast extract, 2% peptone, 2% glucose adjusted to pH 7.0, and 2% sugar. Plates included 2% agar.

**Plasmid Construction.** A seventh exon of  $\alpha$ -syn was found recently. Therefore, in many previous works,  $\alpha$ -syn $\Delta$ 4 is referred to as “ $\alpha$ -syn lacking exon 3” or “ $\alpha$ -syn126,” and  $\alpha$ -syn $\Delta$ 6 is referred to as “ $\alpha$ -syn lacking exon 5” or “ $\alpha$ -syn112” (3).  $\alpha$ -Syn splice isoforms were generated using overlap-extension PCR with Pfu Turbo (Agilent Technologies). The second round of PCR also added the sequences required for subcloning via BP reaction into pDONR221 (Invitrogen) (4, 5). The resulting entry clone then was used in an LR reaction to move the insert to a variety of necessary entry vectors, all from the pAG series (6).

For screening previously established genetic modifiers of  $\alpha$ -syn-induced toxicity, the hits were cherry-picked from the Yeast FLEXGene collection (7). Any gene used in low throughput was cherry-picked from the original library and sequence-verified. If required in a different backbone, the gene was moved to pDONR221 by BP reaction and then to a vector of the pAG series by LR reaction. mKate-*CHC1* and mKate-*VPS21* were inserted with the same protocol into pRS-GPD-mKate-ccdB.

**Single-Insertion PCR Analysis.** Colony PCR was used to screen all strains for those with a single insertion in the correct locus (Fig. S1A). Correct strains were those that PCR-amplified bands with primers A+B and C+D but not A+D and B+C. Those that were correct by this first screening were analyzed by long-extension PCR (Roche).

**Microscopy Processing.** Cells were induced following standard galactose induction before visualization by fluorescent microscopy. Cells were spun down, washed, and resuspended in 1 $\times$  PBS before being viewed with a Plan Apochromat 100 $\times$ /1.40 NA oil objective lens on a Nikon Eclipse Ti microscope at room temperature. Images were taken with a CoolSNAP HQ camera (Photometrics). Z stacks were taken above and below the plane of focus and then were deconvoluted by using the 3D deconvolution algorithm in the NIS-Elements HR software.

1. Gietz RD, Schiestl RH, Willems AR, Woods RA (1995) Studies on the transformation of intact yeast cells by the LiAc/SS-DNA/PEG procedure. *Yeast* 11:355–360.
2. Cooper AA, et al. (2006) Alpha-synuclein blocks ER-golgi traffic and Rab1 rescues neuron loss in Parkinson's models. *Science* 313(5785):324–328.
3. Beyer K, Ariza A (2013)  $\alpha$ -Synuclein posttranslational modification and alternative splicing as a trigger for neurodegeneration. *Mol Neurobiol* 47(2):509–524.
4. Hartley JL, Temple GF, Brasch MA (2000) DNA cloning using in vitro site-specific recombination. *Genome Res* 10:1788–1795.
5. Walhout AJ, et al. (2000) GATEWAY recombinational cloning: application to the cloning of large numbers of open reading frames or ORFeomes. *Methods Enzymol* 328:575–592.
6. Alberti S, Gitler AD, Lindquist S (2007) A suite of Gateway cloning vectors for high-throughput genetic analysis in *Saccharomyces cerevisiae*. *Yeast* 24(10):913–919.
7. Hu Y, et al. (2007) Approaching a complete repository of sequence-verified protein-encoding clones for *Saccharomyces cerevisiae*. *Genome Res* 17:536–543.

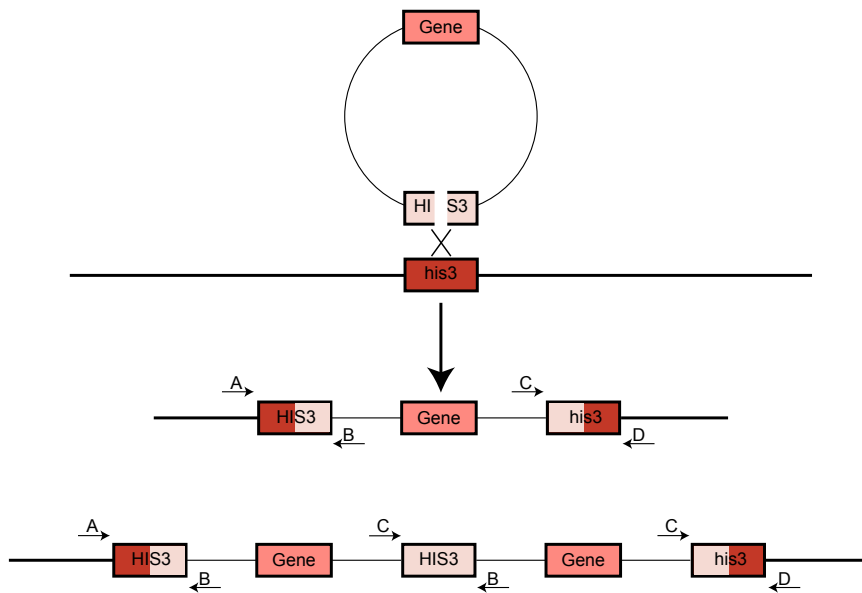

**Fig. S1.** Diagram showing the primer placement for testing for single integration of pRS plasmids. Primers were designed to be used regardless of the identity of the inserted gene. Colony PCR was used with primer sets A+B, C+D, A+D, and B+C. A+B and C+D would result in a band if there was a correct insertion; A+D would result in a band if there was no correct insertion, and B+C would result in a band if there were tandem insertions. After this screening, long-extension PCR was used with primers A+D to confirm the results.

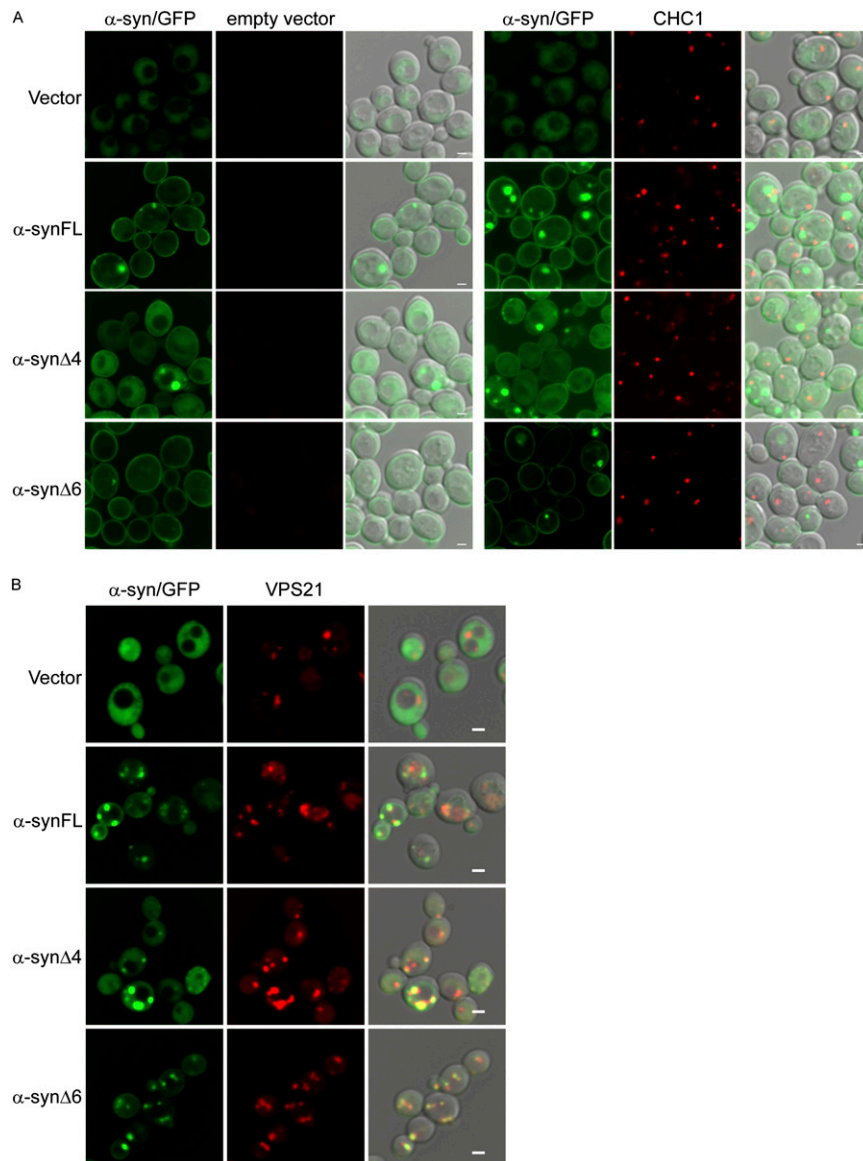

**Fig. S2.** (A) Fluorescent microscopy of  $\alpha$ -syn-GFP-expressing cells with the addition of an empty vector or mKate-clathrin heavy chain 1 (Chc1p). (Scale bars, 2  $\mu$ m.) (B) Fluorescent microscopy showing colocalization of  $\alpha$ -syn-GFP and mKate-vacuolar protein sorting 21 (Vps21p). (Scale bars, 2  $\mu$ m.)

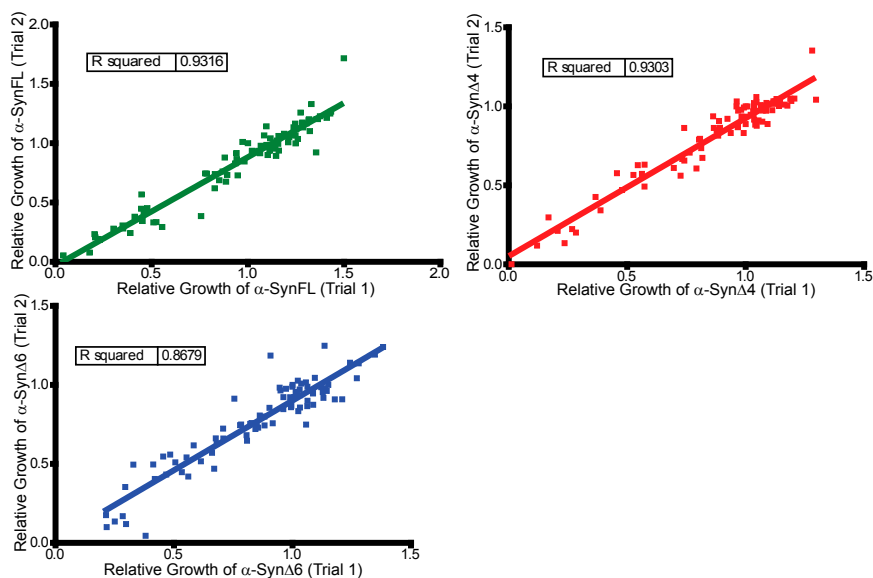

**Fig. S3.** High-throughput transformation of splice isoforms with genetic modifiers of  $\alpha$ -syn-induced toxicity produced reproducible results. Each spot on each graph represents the rate of growth of one splice isoform of  $\alpha$ -syn strain transformed with one genetic modifier on two separate trials.

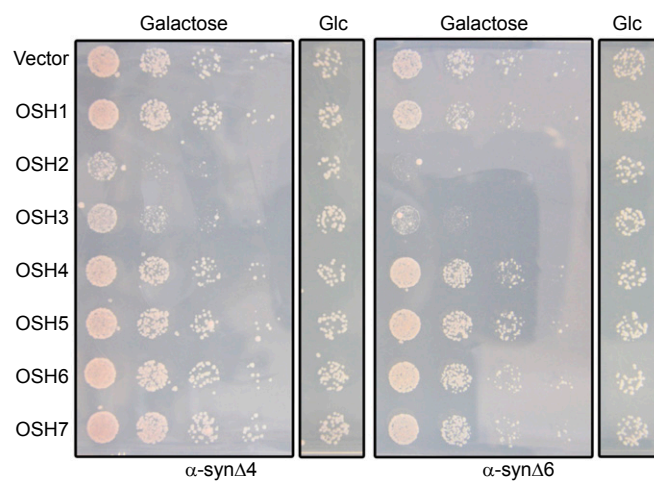

**Fig. S4.** Spot test analysis of the  $\alpha$ -syn splice isoform-expressing strains in the presence of all seven OSH family members. Glc, glucose.

**Table S1. Strain list**

| Strain                                      | Genotype                                                                                                                                                                   |
|---------------------------------------------|----------------------------------------------------------------------------------------------------------------------------------------------------------------------------|
| 1× $\alpha$ -synFL GFP                      | W303 mat a pAG306 Gal $\alpha$ -synFL GFP                                                                                                                                  |
| 2× $\alpha$ -synFL GFP                      | W303 mat a pAG305 Gal $\alpha$ -synFL GFP pAG306 Gal $\alpha$ -synFL GFP                                                                                                   |
| 3× $\alpha$ -synFL GFP                      | W303 mat a pAG304 Gal $\alpha$ -synFL GFP pAG305 Gal $\alpha$ -synFL GFP pAG306 Gal $\alpha$ -synFL GFP                                                                    |
| 4× $\alpha$ -synFL GFP                      | W303 mat a pAG303 Gal $\alpha$ -synFL GFP pAG304 Gal $\alpha$ -synFL GFP pAG305 Gal $\alpha$ -synFL GFP pAG306 Gal $\alpha$ -synFL GFP                                     |
| 4× $\alpha$ -synFL DsRed                    | W303 mat a pAG303 Gal $\alpha$ -synFL DsRed pAG304 Gal $\alpha$ -synFL DsRed pAG305 Gal $\alpha$ -synFL DsRed pAG306 Gal $\alpha$ -synFL DsRed                             |
| 1× $\alpha$ -syn $\Delta$ 4 GFP             | W303 mat a pAG306 Gal $\alpha$ -syn $\Delta$ 4 GFP                                                                                                                         |
| 4× $\alpha$ -syn $\Delta$ 4 GFP             | W303 mat a pAG303 Gal $\alpha$ -syn $\Delta$ 4 GFP pAG304 Gal $\alpha$ -syn $\Delta$ 4 GFP pAG305 Gal $\alpha$ -syn $\Delta$ 4 GFP pAG306 Gal $\alpha$ -syn $\Delta$ 4 GFP |
| 1× $\alpha$ -syn $\Delta$ 6 GFP             | W303 mat a pAG306 Gal $\alpha$ -syn $\Delta$ 6 GFP                                                                                                                         |
| 4× $\alpha$ -syn $\Delta$ 6 GFP             | W303 mat a pAG303 Gal $\alpha$ -syn $\Delta$ 6 GFP pAG304 Gal $\alpha$ -syn $\Delta$ 6 GFP pAG305 Gal $\alpha$ -syn $\Delta$ 6 GFP pAG306 Gal $\alpha$ -syn $\Delta$ 6 GFP |
| 2× $\alpha$ -synFL DsRed                    | W303 mat a pAG303 Gal $\alpha$ -syn $\Delta$ 4 GFP pAG304 Gal $\alpha$ -synFL                                                                                              |
| 2× $\alpha$ -syn $\Delta$ 4 GFP             | DsRed pAG305 Gal $\alpha$ -synFL DsRed pAG306 Gal $\alpha$ -syn $\Delta$ 4 GFP                                                                                             |
| 2× $\alpha$ -synFL DsRed                    | W303 mat a pAG303 Gal $\alpha$ -syn $\Delta$ 6 GFP pAG304 Gal $\alpha$ -synFL                                                                                              |
| 2× $\alpha$ -syn $\Delta$ 6 GFP             | DsRed pAG305 Gal $\alpha$ -synFL DsRed pAG306 Gal $\alpha$ -syn $\Delta$ 6 GFP                                                                                             |
| Vector a                                    | W303 mat a pAG303 Gal GFP pAG304 Gal GFP                                                                                                                                   |
| $\alpha$ -synFL multicopy a                 | W303 mat a pAG303 Gal $\alpha$ -synFL GFP pAG304 Gal $\alpha$ -synFL GFP                                                                                                   |
| $\alpha$ -syn $\Delta$ 4 multicopy a        | W303 mat a pAG303 Gal $\alpha$ -syn $\Delta$ 4 GFP pAG304 Gal $\alpha$ -syn $\Delta$ 4 GFP                                                                                 |
| $\alpha$ -syn $\Delta$ 6 multicopy a        | W303 mat a pAG303 Gal $\alpha$ -syn $\Delta$ 6 GFP pAG304 Gal $\alpha$ -syn $\Delta$ 6 GFP                                                                                 |
| Vector $\alpha$                             | W303 mat $\alpha$ pAG303 Gal GFP pAG304 Gal GFP                                                                                                                            |
| $\alpha$ -synFL multicopy $\alpha$          | W303 mat $\alpha$ pAG303 Gal $\alpha$ -synFL GFP pAG304 Gal $\alpha$ -synFL GFP                                                                                            |
| $\alpha$ -syn $\Delta$ 4 multicopy $\alpha$ | W303 mat $\alpha$ pAG303 Gal $\alpha$ -syn $\Delta$ 4 GFP pAG304 Gal $\alpha$ -syn $\Delta$ 4 GFP                                                                          |
| $\alpha$ -syn $\Delta$ 6 multicopy $\alpha$ | W303 mat $\alpha$ pAG303 Gal $\alpha$ -syn $\Delta$ 6 GFP pAG304 Gal $\alpha$ -syn $\Delta$ 6 GFP                                                                          |
| A $\beta$                                   | W303 mat $\alpha$ pAG305 Gal A $\beta$                                                                                                                                     |
| <i>bar1</i>                                 | mat a bar1 leu2 ura3 trp1 his2 ade1                                                                                                                                        |

**Table S2. Genes tested in high-throughput analysis of  $\alpha$ -syn suppressors and enhancers**

| Yeast gene                | Effect with $\alpha$ -synFL | Effect with $\alpha$ -syn $\Delta$ 4 | Effect with $\alpha$ -syn $\Delta$ 6 |
|---------------------------|-----------------------------|--------------------------------------|--------------------------------------|
| Amino acid transport      |                             |                                      |                                      |
| <i>AVT4</i>               | Suppressor                  | Suppressor                           | Suppressor                           |
| <i>DIP5</i>               | Suppressor                  | Suppressor                           | Suppressor                           |
| <i>LST8</i>               | Suppressor                  | Suppressor                           | Suppressor                           |
| Autophagy                 |                             |                                      |                                      |
| <i>NVJ1</i>               | Suppressor                  | Suppressor                           | Suppressor                           |
| Cytoskeleton              |                             |                                      |                                      |
| <i>ICY1</i>               | Suppressor                  | Suppressor                           | Suppressor                           |
| <i>ICY2</i>               | Suppressor                  | Suppressor                           | Suppressor                           |
| Manganese transport       |                             |                                      |                                      |
| <i>CCC1</i>               | Suppressor                  | Suppressor                           | Suppressor                           |
| <i>PMR1</i>               | Enhancer                    | Enhancer                             | Enhancer                             |
| Protein phosphorylation   |                             |                                      |                                      |
| <i>IME2</i>               | Suppressor                  | Suppressor                           | Suppressor                           |
| <i>PTP2</i>               | Suppressor                  | Suppressor                           | Suppressor                           |
| <i>GIP2</i>               | Suppressor                  | Suppressor                           | Suppressor                           |
| <i>YCK3</i>               | Suppressor                  | Suppressor                           | Suppressor                           |
| <i>RCK1</i>               | Suppressor                  | Suppressor                           | Suppressor                           |
| <i>CDC5</i>               | Suppressor                  | Suppressor                           | Suppressor                           |
| <i>PTC4</i>               | Suppressor                  | Suppressor                           | Suppressor                           |
| <i>SIT4</i>               | Enhancer                    | Enhancer                             | Enhancer                             |
| <i>CAX4</i>               | Enhancer                    | Enhancer                             | Enhancer                             |
| <i>PPZ2</i>               | Enhancer                    | Enhancer                             | Enhancer                             |
| <i>PPZ1</i>               | Enhancer                    | Enhancer                             | Enhancer                             |
| Transcription/translation |                             |                                      |                                      |
| <i>CUP9</i>               | Suppressor                  | Suppressor                           | Suppressor                           |
| <i>HAP4</i>               | Suppressor                  | Suppressor                           | Suppressor                           |
| <i>FZF1</i>               | Suppressor                  | Suppressor                           | Suppressor                           |
| <i>MGA2</i>               | Suppressor                  | Suppressor                           | Suppressor                           |
| <i>MKS1</i>               | Enhancer                    | Enhancer                             | Enhancer                             |
| <i>VHR1</i>               | Suppressor                  | Suppressor                           | Suppressor                           |
| <i>JSN1</i>               | Suppressor                  | Suppressor                           | Suppressor                           |
| <i>SUT2</i>               | Enhancer                    | Enhancer                             | Enhancer                             |
| <i>TIF4632</i>            | Suppressor                  | Suppressor                           | Suppressor                           |
| <i>STB3</i>               | Suppressor                  | Suppressor                           | Suppressor                           |
| <i>MATALPHA1</i>          | Enhancer                    | Less enhancement                     | Less enhancement                     |
| Trehalose biosynthesis    |                             |                                      |                                      |
| <i>UGP1</i>               | Suppressor                  | Suppressor                           | Suppressor                           |
| <i>TPS3</i>               | Suppressor                  | Suppressor                           | Suppressor                           |
| <i>NTH1</i>               | Suppressor                  | Suppressor                           | Suppressor                           |
| Ubiquitin-related         |                             |                                      |                                      |
| <i>CDC4</i>               | Suppressor                  | Suppressor                           | Suppressor                           |
| <i>UIP5</i>               | Suppressor                  | Suppressor                           | Suppressor                           |
| <i>HRD1</i>               | Suppressor                  | Suppressor                           | Suppressor                           |
| <i>UBP11</i>              | Enhancer                    | Enhancer                             | Enhancer                             |
| <i>UBP7</i>               | Enhancer                    | Enhancer                             | Enhancer                             |
| Vesicular transport,      |                             |                                      |                                      |
| ER-Golgi                  |                             |                                      |                                      |
| <i>YPT1</i>               | Suppressor                  | Suppressor                           | Suppressor                           |
| <i>YKT6</i>               | Suppressor                  | Suppressor                           | Suppressor                           |
| <i>BRE5</i>               | Suppressor                  | Suppressor                           | Suppressor                           |
| <i>SEC21</i>              | Suppressor                  | Suppressor                           | Suppressor                           |
| <i>UBP3</i>               | Suppressor                  | Suppressor                           | Suppressor                           |
| <i>ERV29</i>              | Suppressor                  | Suppressor                           | Suppressor                           |
| <i>SEC28</i>              | Suppressor                  | Suppressor                           | Suppressor                           |
| <i>SFT1</i>               | Suppressor                  | Suppressor                           | Suppressor                           |
| <i>GLO3</i>               | Enhancer                    | Enhancer                             | Enhancer                             |
| <i>TRS120</i>             | Enhancer                    | Enhancer                             | Enhancer                             |
| <i>GYP8</i>               | Enhancer                    | Enhancer                             | Enhancer                             |
| <i>YIP3</i>               | Enhancer                    | Enhancer                             | Enhancer                             |
| <i>BET4</i>               | Enhancer                    | Enhancer                             | Enhancer                             |
| <i>SLY41</i>              | Enhancer                    | Enhancer                             | Enhancer                             |
| <i>GOS1</i>               | Enhancer                    | Enhancer                             | Enhancer                             |

**Table S2. Cont.**

| Yeast gene               | Effect with $\alpha$ -synFL | Effect with $\alpha$ -syn $\Delta$ 4 | Effect with $\alpha$ -syn $\Delta$ 6 |
|--------------------------|-----------------------------|--------------------------------------|--------------------------------------|
| <i>SEC31</i>             | Enhancer                    | Enhancer                             | Enhancer                             |
| Other cellular processes |                             |                                      |                                      |
| <i>PFS1</i>              | Suppressor                  | Suppressor                           | Suppressor                           |
| <i>PDE2</i>              | Suppressor                  | Suppressor                           | Suppressor                           |
| <i>MUM2</i>              | Suppressor                  | Suppressor                           | Suppressor                           |
| <i>OSH2</i>              | Suppressor                  | Enhancer                             | Enhancer                             |
| <i>OSH3</i>              | Suppressor                  | Enhancer                             | Enhancer                             |
| <i>PHO80</i>             | Suppressor                  | Suppressor                           | Enhancer                             |
| <i>ISN1</i>              | Suppressor                  | Suppressor                           | Suppressor                           |
| <i>EPS1</i>              | Enhancer                    | Enhancer                             | Enhancer                             |
| <i>IDS2</i>              | Enhancer                    | Enhancer                             | Enhancer                             |
| <i>TPO4</i>              | Enhancer                    | Enhancer                             | Enhancer                             |
| <i>QDR3</i>              | Suppressor                  | Less enhancement                     | Less enhancement                     |
| <i>IZH3</i>              | Enhancer                    | Enhancer                             | Enhancer                             |
| Newly characterized ORFs |                             |                                      |                                      |
| <i>YKL088W (CAB3)</i>    | Suppressor                  | Suppressor                           | Suppressor                           |
| <i>YDL121C</i>           | Suppressor                  | Suppressor                           | Suppressor                           |
| <i>YBR030W (RKM3)</i>    | Suppressor                  | Suppressor                           | Suppressor                           |
| <i>YOR129C (AF1)</i>     | Suppressor                  | Suppressor                           | Suppressor                           |
| <i>YOR291W (YPK9)</i>    | Suppressor                  | Suppressor                           | Suppressor                           |
| Unknown function         |                             |                                      |                                      |
| <i>YKL063C</i>           | Suppressor                  | Suppressor                           | Suppressor                           |
| <i>YML081W (TDA9)</i>    | Suppressor                  | Suppressor                           | Suppressor                           |
| <i>YNR014W</i>           | Suppressor                  | Suppressor                           | Suppressor                           |
| <i>YML083C</i>           | Suppressor                  | Suppressor                           | Suppressor                           |
| <i>YDR374C</i>           | Suppressor                  | Suppressor                           | Suppressor                           |
| <i>YMR111C</i>           | Suppressor                  | Suppressor                           | Suppressor                           |

The genes in this table were identified in refs. 1 and 2. Yellow highlighting marks effects that were different between FL  $\alpha$ -syn and the splice isoforms.

1. Yeger-Lotem E, et al. (2009) Bridging high-throughput genetic and transcriptional data reveals cellular responses to alpha-synuclein toxicity. *Nat Genet* 41(3):316–323.
2. Cooper AA, et al. (2006) Alpha-synuclein blocks ER-Golgi traffic and Rab1 rescues neuron loss in Parkinson's models. *Science* 313(5785):324–328.
